# Supplementary material for: Dynamic Adsorption of a Cationic Dye onto Wool Fibers as Column-Filling Media: Response Surface Optimization and Fixed-Bed Adsorption Modeling
Source: MDPI journal article supplement (doi:10.3390/ma17040790), 2024-02-06
Supplement: s1 [file s1]

## Supplementary Materials

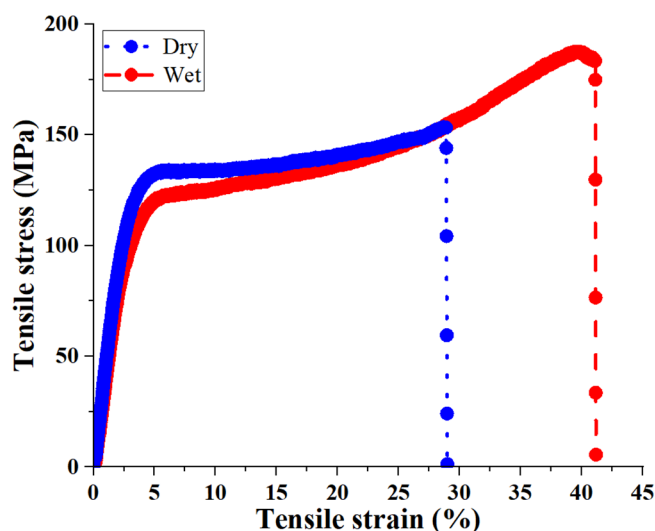

**Figure S1.** Mechanical properties of wool: Stress-strain curves for dry and wet wool fibers.

**Table S1.** Mechanical properties of wool fiber samples.

| Sample                     | Tensile strain (%)<br>(Elongation at break) | Tensile stress (MPa) | Young's modulus<br>(GPa) |
|----------------------------|---------------------------------------------|----------------------|--------------------------|
| Dry Wool<br>Fiber (RH 0%)  | 28.7                                        | 153.5                | 4.72                     |
| Wet Wool<br>Fiber (RH 55%) | 39.9                                        | 187.5                | 4.23                     |

*Note:* RH – relative humidity

Comments on **Figures S1** and **Table S1**: The investigated samples were analyzed in accordance with ASTM standard D 412-06a Standard Test Methods for Vulcanized Rubber and Thermoplastic Elastomers - Adjusted Stress. **Figure S1** shows typical tensile stress-strain curves for dry and wet wool fiber. The stress-strain curves of wool fibers were measured under traction actions at 23 °C and in the conditions of distinct levels of relative humidity (RH); that is 0 % (dry fiber) and RH 55% (wet fiber). The mechanical parameters, such as elongation at break (tensile strain), tensile stress or strength at break, and modulus of elasticity (Young's modulus), were determined, and these values are summarized in **Table S1**. It was observed that tensile strain and stress were greater for wet fiber compared to the dry one. Young's modulus (calculated for linear elastic region) did not change too much for dry and wet wool, describing their ability to resist elastic deformation under load. Overall, the percentage of moisture affects the stress-strain diagram of wool fibers. The higher the RH, the more the fiber can be stretched. Experimental data showed that the dry fiber broke at about 29% elongation, while a wet fiber broke at about 40% elongation. In dynamic adsorption, fibers experience continuous flow and mechanical agitation. Mechanical testing can help assess the fibers' resistance to wear and tear under dynamic conditions. This is important for long-term performance and sustainability of the adsorption process. Likewise, mechanical testing outcomes are useful in assessing the fibers' ability to withstand multiple adsorption-desorption cycles (i.e., their potential for repeated use).

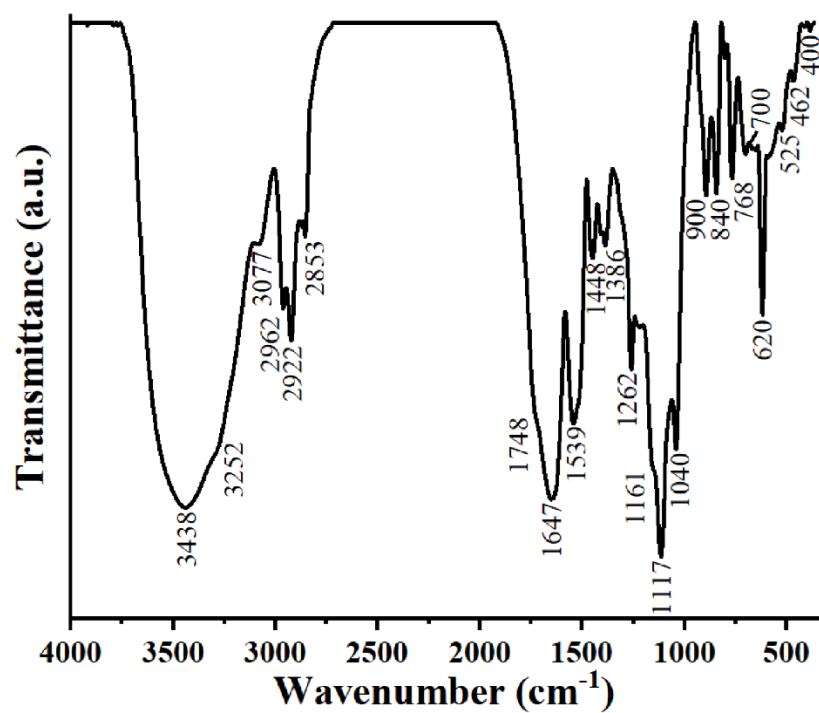

Figure S2. Infrared spectrum (FTIR) for the investigated coarse wool fiber.

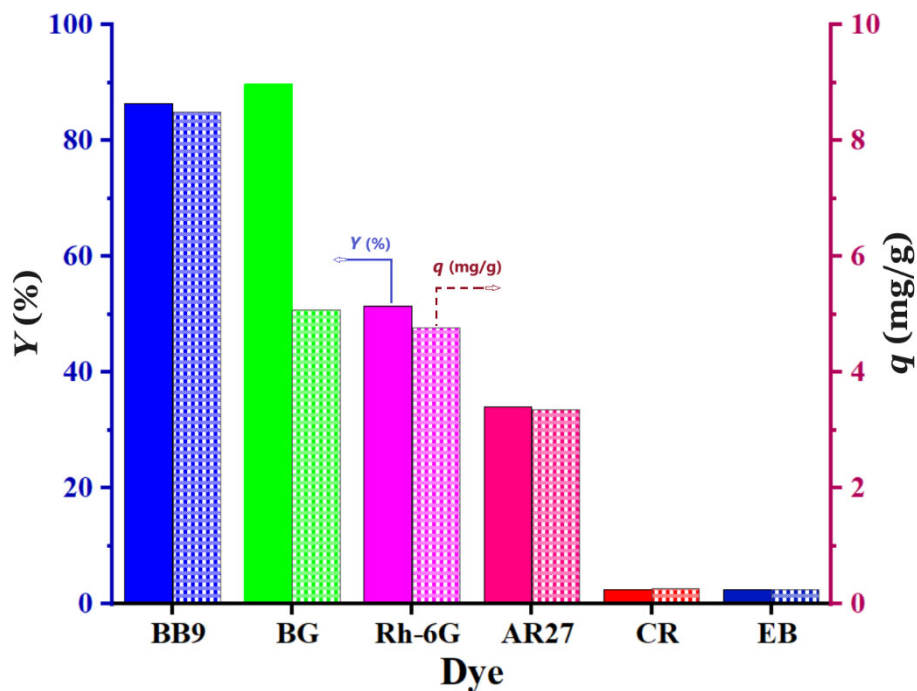

Figure S3. Comparative analysis of the performance of coarse wool fibers for adsorption of various dyes dissolved in aqueous solutions, i.e., cationic dyes (BB9, BG, Rh-6G) and anionic dyes (AR27, CR, EB); dyes' abbreviations: BB9 - basic blue 9; BG - brilliant green; Rh-6G - rhodamine 6G; AR27 - acid red 27; CR - congo red; EB - Evans blue; experimental conditions: initial dye concentration of 50 mg/L, adsorbent dose 0.5% w/v,  $T=300\text{K}$  and 2h contact time.

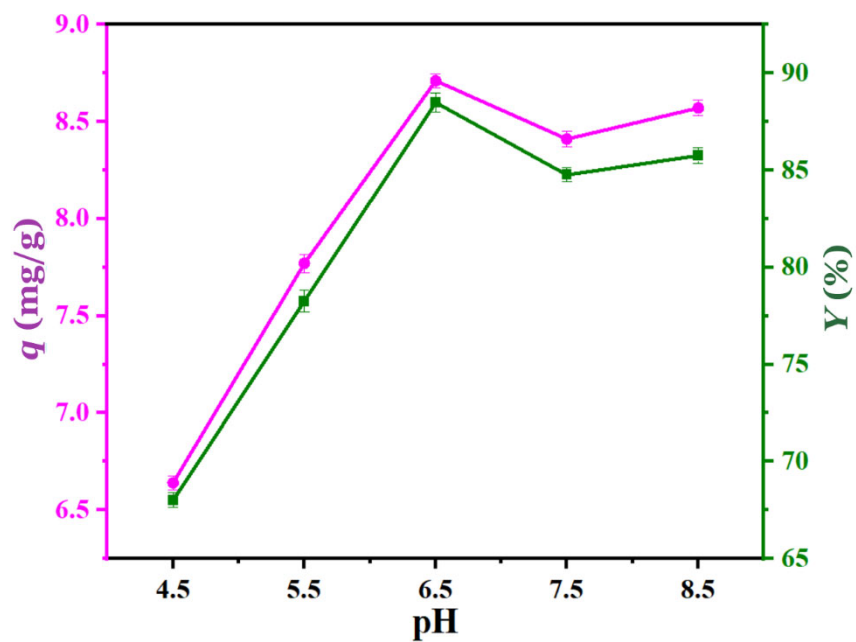

**Figure S4.** Effect of initial pH of aqueous solutions on the adsorption BB9 cation dye onto the surface of coarse wool fibers; experimental conditions:  $C_0=50$  mg/L, adsorbent dose 0.5% w/v,  $T=300$ K, and contact time of 2 h.

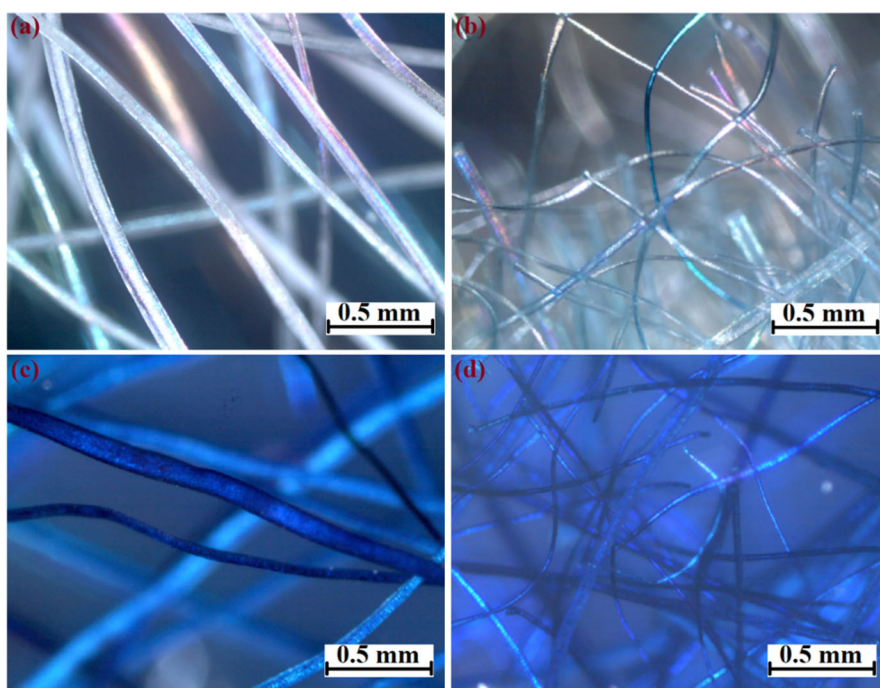

**Figure S5.** Micrographs from optical microscopy with polarized light showing: (a) pristine (non-loaded) coarse wool fibers; (b, c, d) spent coarse wool fibers loaded with BB9 cationic dye.

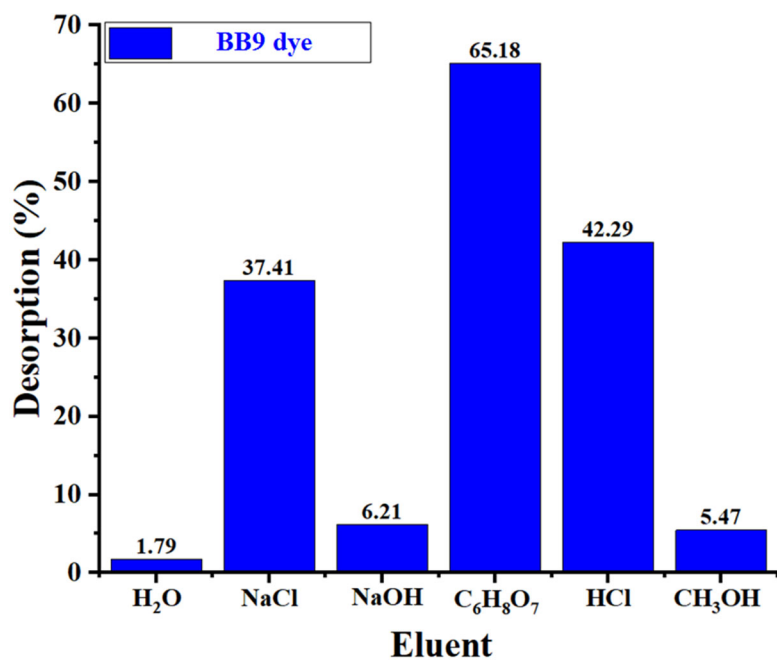

**Figure S6.** Desorption efficiency of BB9 dye from spent adsorbent (loaded wool fibers) in different eluent solutions of 1M concentration (desorption time 2 h and working volume 15 mL).

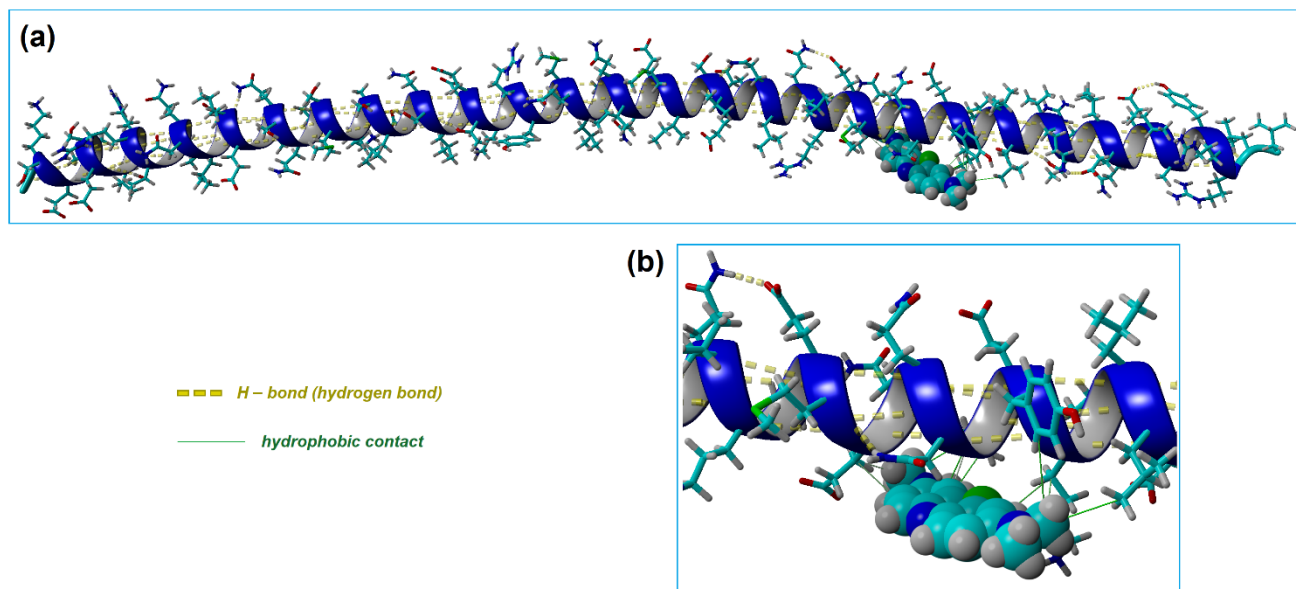

**Figure S7.** Molecular docking simulation outcomes: (a) best docking pose of MB (ligand molecule) onto the  $\alpha$ -keratin (receptor macromolecule taken from PDB ID: 6JFV) and (b) zoom-in image of the binding site highlighting the hydrophobic contacts.

**Table S2.** Energy of intermolecular interactions between BB9 (ligand) and  $\alpha$ -Keratin (receptor) computed by molecular mechanics theory at the level of Yasara force field.

| Docking system          | Total energy of intermolecular interaction, $\Delta E^{(Total)}$ , kcal/mol | VdW intermolecular interaction energy, $\Delta E^{(VdW)}$ , kcal/mol | Coulomb intermolecular interaction energy, $\Delta E^{(Coulomb)}$ , kcal/mol |
|-------------------------|-----------------------------------------------------------------------------|----------------------------------------------------------------------|------------------------------------------------------------------------------|
| BB9 / $\alpha$ -Keratin | -62.72                                                                      | -26.13                                                               | -36.59                                                                       |

Note: Mathematical relationships for interaction energies calculations, where  $E$  is potential energy according to the force field:

$$\Delta E^{(Total)} = E_{Complex}^{(Total)} - (E_{Receptor}^{(Total)} + E_{Ligand}^{(Total)}) \quad \Delta E^{(Total)} \cong \Delta E^{(VdW)} + \Delta E^{(Coulomb)}$$

$$\Delta E^{(VdW)} = E_{Complex}^{(VdW)} - (E_{Receptor}^{(VdW)} + E_{Ligand}^{(VdW)}) \quad \Delta E^{(Coulomb)} = E_{Complex}^{(Coulomb)} - (E_{Receptor}^{(Coulomb)} + E_{Ligand}^{(Coulomb)})$$

**Table S3.** ANOVA assay for the built mathematical model  $\hat{Y}(x_1, x_2)$ .

| Source   | DF <sup>(a)</sup> | SS <sup>(b)</sup> | MS <sup>(c)</sup> | F-value <sup>(d)</sup> | p-value <sup>(e)</sup> | R <sup>2</sup> <sup>(f)</sup> | R <sub>adj</sub> <sup>2</sup> <sup>(g)</sup> |
|----------|-------------------|-------------------|-------------------|------------------------|------------------------|-------------------------------|----------------------------------------------|
| Model    | 2202.82           | 5                 | 440.56            | 46.27                  | 0.0003                 | 0.978                         | 0.957                                        |
| Residual | 47.62             | 5                 | 9.52              |                        |                        |                               |                                              |
| Total    | 2250.44           | 10                |                   |                        |                        |                               |                                              |

<sup>(a)</sup> degree of freedom; <sup>(b)</sup> sum of squares; <sup>(c)</sup> mean square; <sup>(d)</sup> ratio between mean squares; <sup>(e)</sup> probability of randomness (noise); <sup>(f)</sup> coefficient of multiple correlation; <sup>(g)</sup> adjusted coefficient of determination.

Comments on **Table S3**: Outcomes of ANOVA (**Table S3**) indicate an  $F$ -value equal to 46.27 and a quite small  $p$ -value (0.0003) suggesting a significant model from a statistical viewpoint. That is, this model was validated and can be employed to make predictions regarding the process performance in the designed space (region of experimentation). Furthermore, the value of the multiple-correlation coefficient  $R^2$  indicates that the empirical model can explain more than 97% of data variation. Likewise, the adjusted coefficient  $R_{adj}^2$  is quite close to  $R^2$ , disclosing that the data-driven model containing main, interaction, and quadratic effects provides reliable predictions.

**Table S4.** Adsorption capacity and retained amount of pollutant calculated at different times from breakthrough kinetic models ( $m_s=1.93$  g,  $F_v=3$  mL/min,  $H=13.5$  cm,  $C_0=5$  mg/L).

| Model               | Adsorption capacity ( $q_x$ )<br>[mg / g] in dynamic regime | Retained amount ( $A_x= q_x \times m_s$ )<br>of pollutant [mg] on fixed bed |
|---------------------|-------------------------------------------------------------|-----------------------------------------------------------------------------|
| <i>Adams-Bohart</i> | $q_b = 0.601$                                               | $A_b = 1.160$                                                               |
|                     | $q_i = 1.569$                                               | $A_i = 3.028$                                                               |
|                     | $q_s = 5.556$                                               | $A_s = 10.723$                                                              |
|                     | $q_f = 5.630$                                               | $A_f = 10.865$                                                              |
| <i>Thomas</i>       | $q_b = 0.684$                                               | $A_b = 1.321$                                                               |
|                     | $q_i = 1.800$                                               | $A_i = 3.475$                                                               |
|                     | $q_s = 5.479$                                               | $A_s = 10.574$                                                              |
|                     | $q_f = 5.638$                                               | $A_f = 10.882$                                                              |
| <i>Yoon-Nelson</i>  | $q_b = 0.684$                                               | $A_b = 1.320$                                                               |
|                     | $q_i = 1.800$                                               | $A_i = 3.475$                                                               |
|                     | $q_s = 5.479$                                               | $A_s = 10.574$                                                              |
|                     | $q_f = 5.638$                                               | $A_f = 10.882$                                                              |
| <i>Yan</i>          | $q_b = 0.699$                                               | $A_b = 1.350$                                                               |
|                     | $q_i = 1.860$                                               | $A_i = 3.591$                                                               |
|                     | $q_s = 5.553$                                               | $A_s = 10.716$                                                              |
|                     | $q_f = 5.816$                                               | $A_f = 11.225$                                                              |
| <i>Clark</i>        | $q_b = 0.663$                                               | $A_b = 1.280$                                                               |
|                     | $q_i = 1.741$                                               | $A_i = 3.359$                                                               |
|                     | $q_s = 5.491$                                               | $A_s = 10.597$                                                              |
|                     | $q_f = 5.516$                                               | $A_f = 10.646$                                                              |

Note on subscripts:

$b$  – break point (when  $C_b$  is 5% from  $C_0$ , or  $C_b = 0.05 \times C_0$ ),  $t_b = 90$  min  $\rightarrow Y_b = 99.77\%$  (observed value);

$i$  – intermediary point in breakthrough curve,  $t_i = 240$  min  $\rightarrow Y_i = 92.56\%$  (observed value);

$s$  – saturation point (when  $C_s$  is 95% from  $C_0$ , or  $C_b = 0.95 \times C_0$ ),  $t_s = 1080$  min  $\rightarrow Y_s = 2.26\%$  (obs.);

$f$  – final point in breakthrough curve,  $t_f = 1500$  min  $\rightarrow Y_f = 0.20\%$  (observed value).

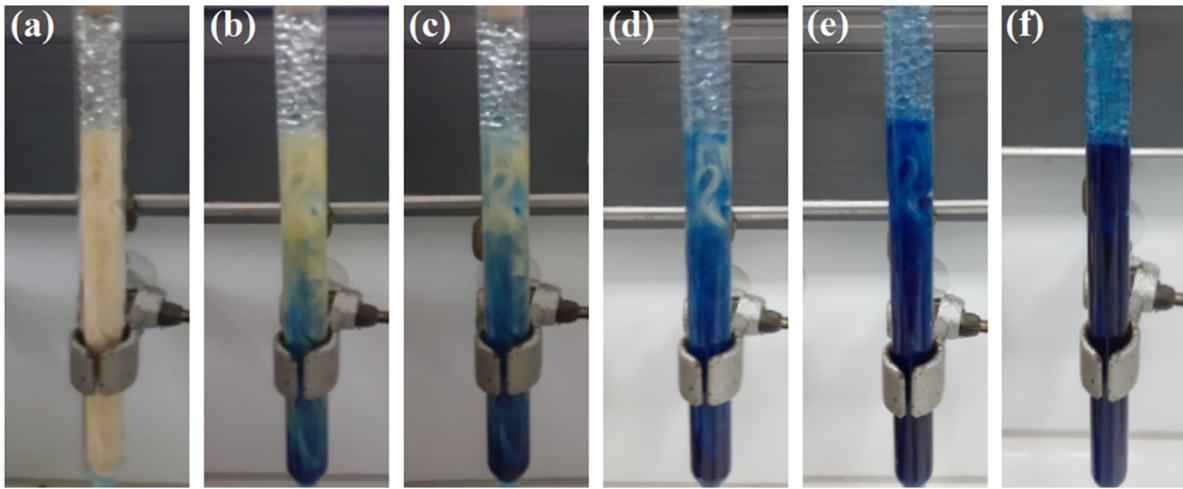

**Figure S8.** Photo-images (snapshots) showing the degree of BB9 loading onto wool fibers in the fixed bed column at different time intervals: (a) 0 min; (b) 120 min; (c) 210 min; (d) 480 min; (e) 780 min and (f) 1500 min.
